# Supplementary material for: Duplex trapping and charge transfer with polysulfides by a diketopyrrolopyrrole-based organic framework for high-performance lithium–sulfur batteries
Source: Royal Society of Chemistry journal article supplement (doi:10.1039/c9ta05996b), 2019-01-01
Supplement: c9ta05996b1.pdf [file c9ta05996b1.pdf]

## Electronic supplementary information

### Duplex trapping and charge transfer with polysulfides by diketopyrrolopyrrole-based organic framework for high-performance lithium-sulfur batteries

Jie Xu,<sup>†</sup> Shiming Bi,<sup>‡</sup> Weiqiang Tang,<sup>†</sup> Qi Kang,<sup>§</sup> Dongfang Niu,<sup>\*,†</sup> Shuozhen Hu,<sup>†</sup>

Shuangliang Zhao,<sup>†</sup> Limin Wang,<sup>‡</sup> Zhong Xin<sup>†</sup> and Xinsheng Zhang<sup>\*,†</sup>

<sup>†</sup> State Key Laboratory of Chemical Engineering and School of Chemical Engineering, East China University of Science and Technology, Shanghai 200237, China.

<sup>‡</sup> Key Laboratory for Advanced Materials, Institute of Fine Chemical, School of Chemistry & Molecular Engineering, East China University of Science and Technology, Shanghai, 200237, China.

<sup>§</sup> Department of Polymer Science and Engineering, Shanghai Key Laboratory of Electrical Insulation and Thermal Ageing, Shanghai Jiao Tong University, Shanghai 200240, PR China.

\*E-mail: dfniu@ecust.edu.cn

\*E-mail: xszhang@ecust.edu.cn

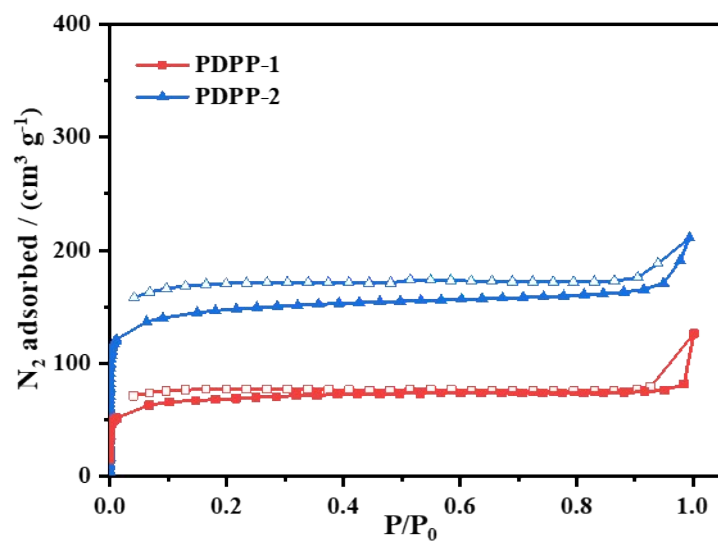

**Figure S1.** N<sub>2</sub> adsorption isotherms of PDPP-1 and PDPP-2 under 77 K.

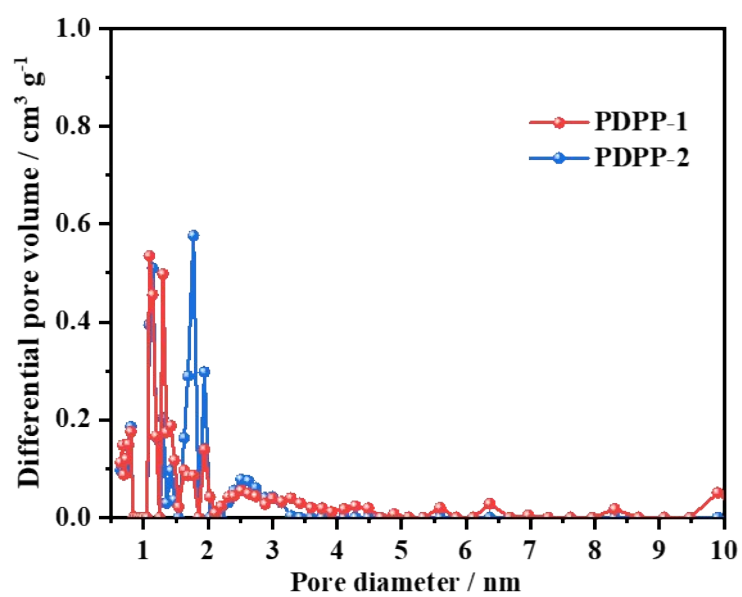

**Figure S2.** Pore size distributions of PDPP-1 and PDPP-2.

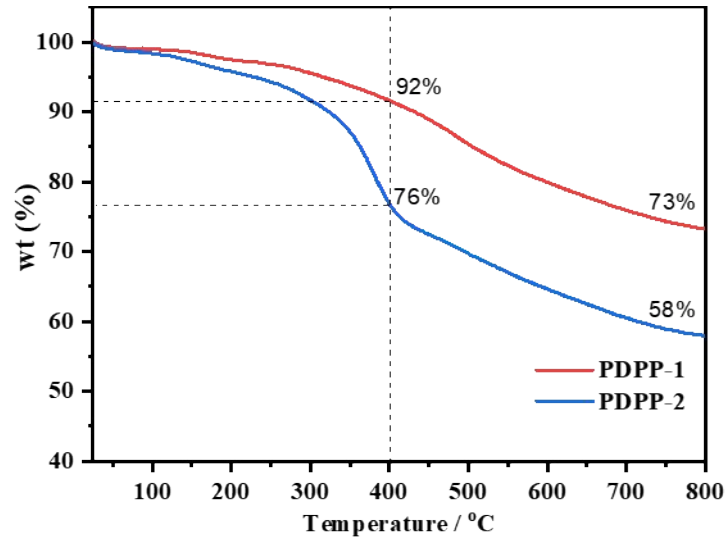

**Figure S3.** Thermogravimetric analysis of PDPP-1 and PDPP-2 under nitrogen atmosphere.

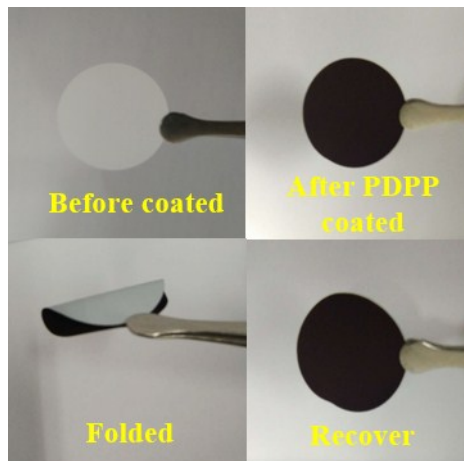

**Figure S4.** Optical images of PDPP separator before and after coating

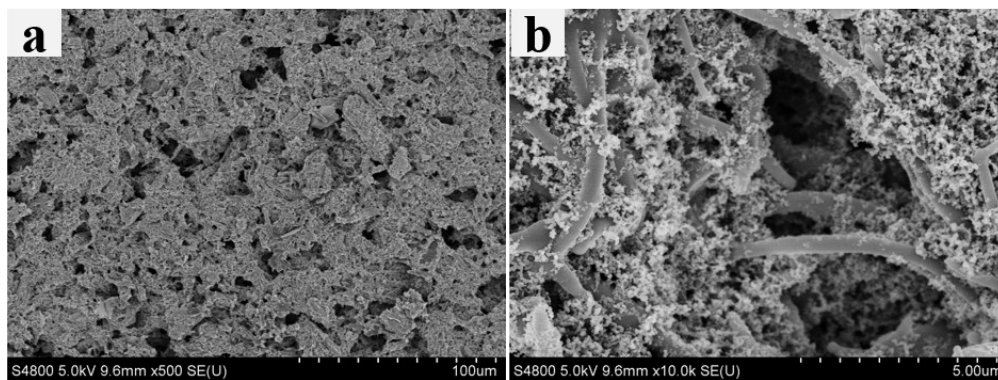

**Figure S5.** SEM images of PDPP-1 modified separator.

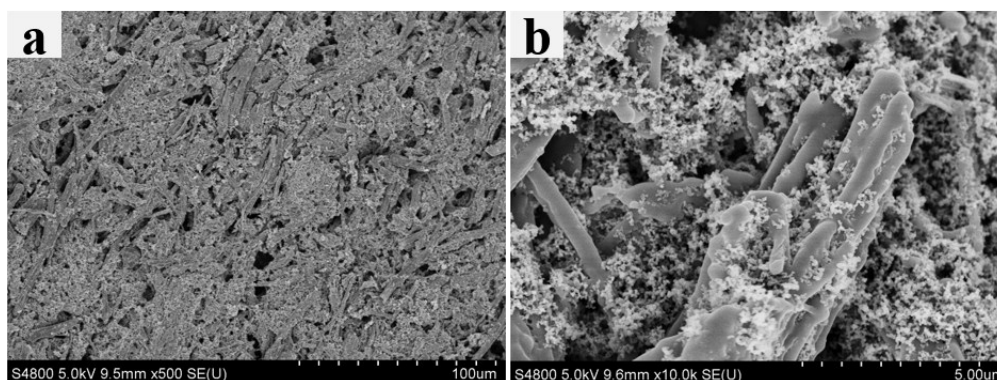

**Figure S6.** SEM images of PDPP-2 modified separator.

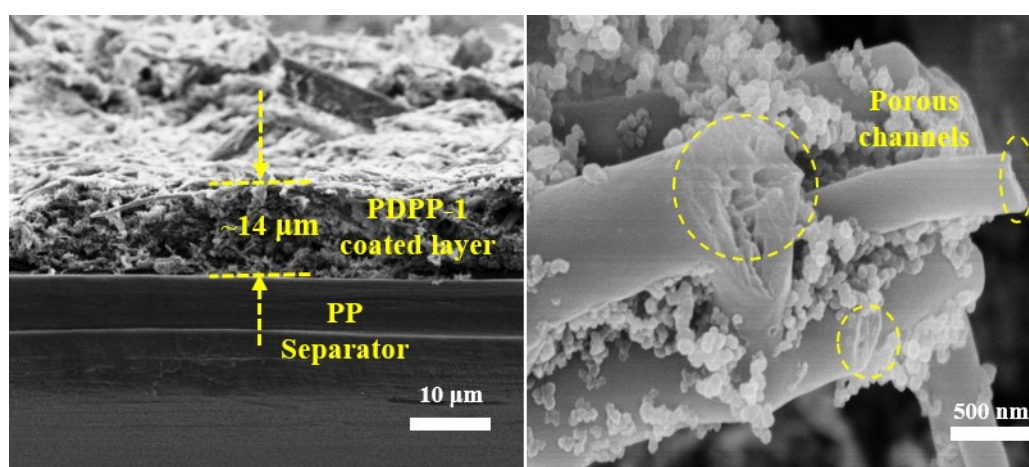

**Figure S7.** Cross sectional SEM images of PDPP-1 modified separator.

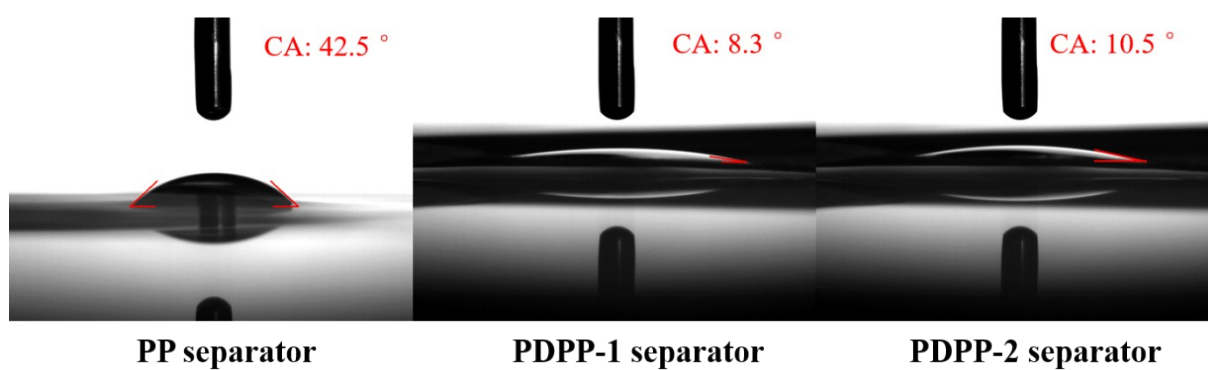

**Figure S8.** Contact angle measurements of PP separator and PDPP-n modified separators.

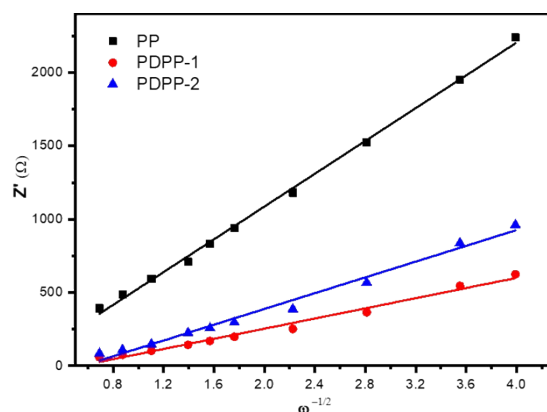

**Figure S9.** Warburg plots of the cells with PP and PDPP separators recorded at initial state.

**Table S1.** EIS test results of the cells with various separator recorded at initial state.

| Separator | $R_s/\Omega$ | $R_{ct}/\Omega$ | Warburg Coefficient |
|-----------|--------------|-----------------|---------------------|
| PP        | 4.6          | 83              | 559                 |
| PDPP-1    | 2.8          | 20              | 173                 |
| PDPP-2    | 3.3          | 33              | 269                 |

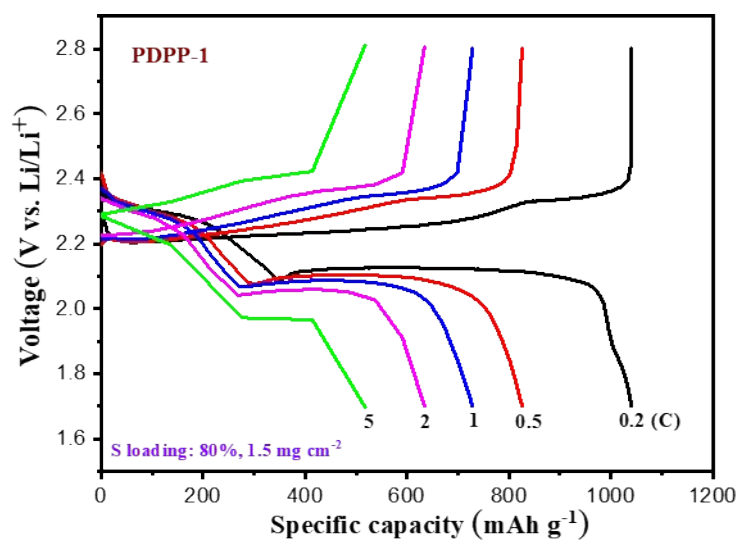

**Figure S10.** Charge/discharge profiles of PDPP-1 at different rates.

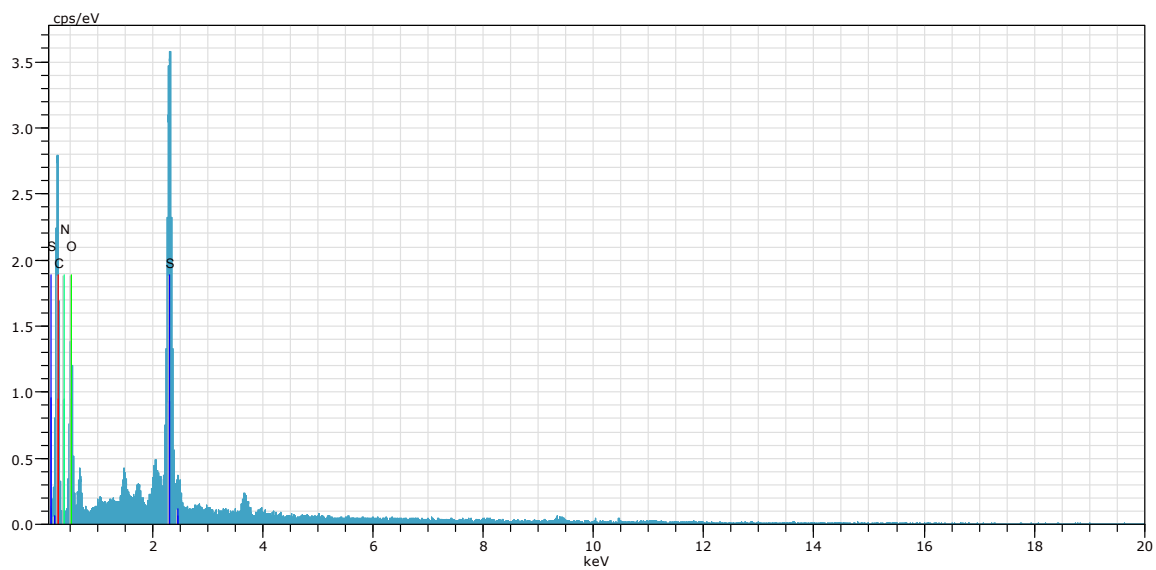

**Figure S11.** EDX spectra of PDPP-1 modified separator over 600 cycles at 1.0 C.

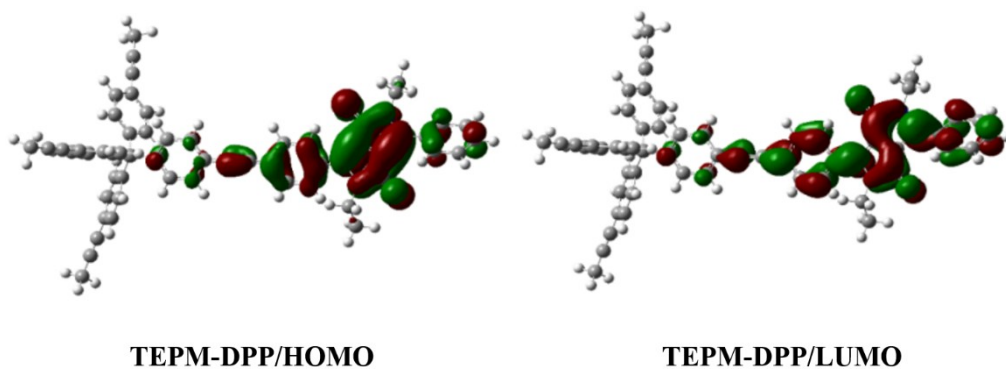

**Figure S12.** Optimized frontier molecular orbital of the monomer of POF (TEPM-DPP).

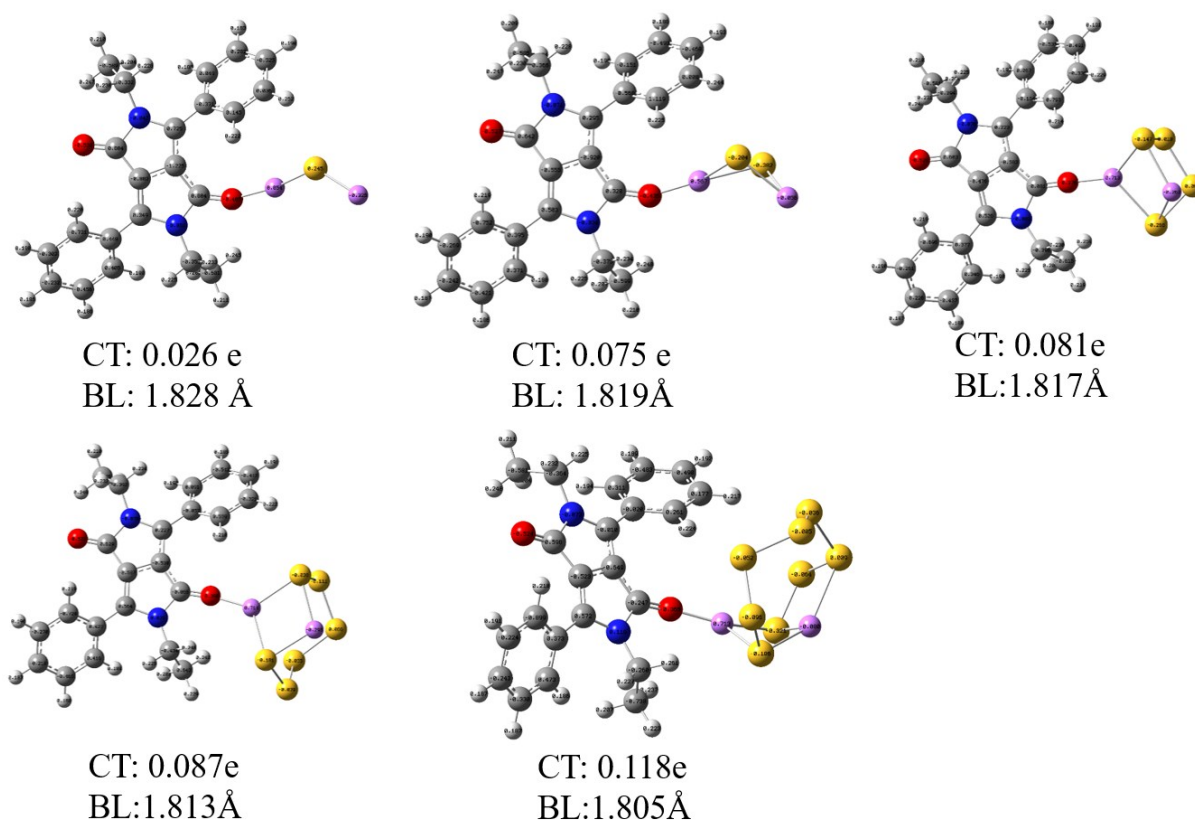

**Figure S13.** Optimized geometry of DPP-LiPSs cluster with charge distribution, charge transfer denoted as CT and bond length denoted as BL.

**Table S2.** Comparison of the electrochemical performance between PDPP-1 and other POP materials modified the cells either in cathode or separator.

| Separator    | Sulfur loading (mg cm <sup>-2</sup> ) | Sulfur content | Cathode   | Discharge Capacity                                                | Publish Year | Ref. |
|--------------|---------------------------------------|----------------|-----------|-------------------------------------------------------------------|--------------|------|
| Celgard 2400 | ~0.2                                  | 24%            | CTF-1/S   | 848 mAh g <sup>-1</sup> , 1 <sup>st</sup> , 0.2 C                 | 2014         | S1   |
| Celgard 2300 | N/A                                   | 25%            | POP-A     | 927 mAh g <sup>-1</sup> , 1 <sup>st</sup> , 0.2 A g <sup>-1</sup> | 2014         | S2   |
| Celgard 2400 | 1.8-2.0                               | 24%            | PPN-13-S  | 1086 mAh g <sup>-1</sup> , 1 <sup>st</sup> , 0.1 C                | 2016         | S3   |
| Celgard 2300 | N/A                                   | 33%            | Por-COF/S | 1000 mAh g <sup>-1</sup> , 1 <sup>st</sup> , 0.1 C                | 2016         | S4   |
| Celgard 2400 | N/A                                   | 37.2%          | S-CTF-1   | 670 mAh g <sup>-1</sup> , 1 <sup>st</sup> , 0.05                  | 2016         | S5   |

|              |         |       |                |                                                                                                                 |      |           |
|--------------|---------|-------|----------------|-----------------------------------------------------------------------------------------------------------------|------|-----------|
| Celgard 2400 | 0.7     | 51.6% | SF-CTF-1 (1:3) | 1138 mAh g <sup>-1</sup> , 1 <sup>st</sup> ,<br>0.05 C                                                          | 2017 | S6        |
| Celgard 2300 | 1.2     | 36.6% | TPE-IEMPO-S    | 900 mAh g <sup>-1</sup> , 1 <sup>st</sup> ,<br>0.1 C                                                            | 2017 | S7        |
| Celgard 2400 | 0.8-1.2 | 49%   | Py-COF/S       | 960 mAh g <sup>-1</sup> , 1 <sup>st</sup> ,<br>0.5 C                                                            | 2018 | S8        |
| Y-FTZB       | 1.0     | 70%   | sulfur         | 1101 mAh g <sup>-1</sup> , 1 <sup>st</sup> ,<br>0.1 C                                                           | 2017 | S9        |
| PB/Celgard   | N/A     | 60%   | KB/sulfur      | 984.1 mAh g <sup>-1</sup> , 1 <sup>st</sup> ,<br>0.2 C                                                          | 2018 | S10       |
| PDPP-1       | 1.5     | 80%   | CB/sulfur      | 1063 mAh g <sup>-1</sup> , 1 <sup>st</sup> ,<br>0.2 C<br>540 mAh g <sup>-1</sup> , 600 <sup>th</sup> ,<br>1.0 C | -    | This work |

### Supplementary references

- [S1] H. Liao, H. Ding, B. Li, X. Ai and C. Wang, *J. Mater. Chem. A*, 2014, **2**, 8854–8858.
- [S2] W. Weng, S. Yuan, N. Azimi, Z. Jiang, Y. Liu, Y. Ren, A. Abouimrane and Z. Zhang, *RSC Adv.*, 2014, **4**, 27518–27521.
- [S3] K. Ding, Q. Liu, Y. Bu, K. Meng, W. Wang, D. Yuan and Y. Wang, *J. Alloy. Compd.*, 2016, **657**, 626-630.
- [S4] H. Liao, H. Wang, H. Ding, X. Meng, H. Xu, B. Wang, X. Ai and C. Wang, *J. Mater. Chem. A*, 2016, **4**, 7416-7421.
- [S5] S. N. Talapaneni, T. H. Hwang, S. H. Je, O. Buyukcakir, J. W. Choi and A. Coskun, *Angew. Chem. Int. Ed.*, 2016, **55**, 3106-3111.
- [S6] S. H. Je, H. J. Kim, J. Kim, J. W. Choi and A. Coskun, *Adv. Funct. Mater.*, 2017, 1703947.
- [S7] B. Zhou, X. Hu, G. Zeng, S. Li, Z. Wen and L. Chen, *ChemSusChem*, 2017, **10**, 2955-2961.
- [S8] Y. Meng, G. Lin, H. Ding, H. Liao and C. Wang, *J. Mater. Chem. A*, 2018, **6**, 17186-17191.
- [S9] M. Li, Y. Wan, J. Huang, A. H. Assen, C. Hsiung, H. Jiang, Y. Han, M. Eddaoudi, Z. Lai, J. Ming and L.-J. Li, *ACS Energy Lett.*, 2017, **2**, 2362–2367.



[S10] X. Wu, L. Fan, Y. Qiu, M. Wang, J. Cheng, B. Guan, Z. Guo, N. Zhang and K. Sun, *ChemSusChem*, 2018, **11**, 3345 – 3351.
